# Supplementary material for: Immune-checkpoint inhibitor plus chemotherapy versus conventional chemotherapy for first-line treatment in advanced non-small cell lung carcinoma: a systematic review and meta-analysis
Source: PubMed Central journal article supplement (PMC6303974; doi:10.1186/s40425-018-0477-9), 2018-12-22
Supplement: 40425_2018_477_MOESM3_ESM.pdf [file 40425_2018_477_MOESM3_ESM.pdf]

**Supplementary Table 1. Quality assessment: risk of bias by Cochrane Collaboration's tool**

| Trial                      | Sequence generation | Allocation concealment        | Blinding                                 | Incomplete outcome data | Selective reporting                                | Other source of bias                               |
|----------------------------|---------------------|-------------------------------|------------------------------------------|-------------------------|----------------------------------------------------|----------------------------------------------------|
| KEYNOTE-189, 2018          | Adequate            | Adequate (Central allocation) | Adequate (Independent radiologic review) | Adequate                | Adequate                                           |                                                    |
| IMpower150, 2018           | Adequate            | Adequate (Central allocation) | Adequate (Independent radiologic review) | Adequate                | Adequate                                           |                                                    |
| KEYNOTE-021, 2016 and 2018 | Adequate            | Adequate (Central allocation) | Adequate (Independent radiologic review) | Adequate                | Adequate                                           |                                                    |
| KEYNOTE-407, 2018          | Adequate            | Adequate (Central allocation) | Adequate (Independent radiologic review) | Adequate                | Adequate                                           | Data from the abstract and the presentation slides |
| IMpower131, 2018           | Adequate            | Adequate (Central allocation) | Adequate (Independent radiologic review) | Adequate                | Adequate                                           | Data from the abstract and the presentation slides |
| CheckMate 227, 2018        | Adequate            | Adequate (Central allocation) | Adequate (Independent radiologic review) | Adequate                | Inadequate (overall survival was not reported yet) | Data from the abstract and the presentation slides |

**Supplementary Table 2. Additional characteristics of patients comparing IO-Chemotherapy with Chemotherapy in included trials**

| Source                     | Design                                       | Chemotherapy Drug                                                                                                                 | Disease stage | Enrolment time | Primary end point        | Secondary end point              | Positive <sup>a</sup> EGFR mutation (n (%)) | Positive <sup>a</sup> ALK mutation (n (%)) | PD-L1 staining antibody clone |
|----------------------------|----------------------------------------------|-----------------------------------------------------------------------------------------------------------------------------------|---------------|----------------|--------------------------|----------------------------------|---------------------------------------------|--------------------------------------------|-------------------------------|
| KEYNOTE-189, 2018          | Phase 3, double-blind, Crossover permitted   | AP or AC<br>i) cisplatin (75 mg/m <sup>2</sup> Q3W) or carboplatin (6mg/ml/min Q3W)<br>ii) pemetrexed (500 mg/m <sup>2</sup> Q3W) | IV            | 2016-2017      | PFS, OS                  | ORR, DOR, safety                 | 0                                           | 0                                          | 22C3                          |
| IMpower150, 2018           | Phase 3, open-lable, Crossover not permitted | BCP<br>i) carboplatin (6mg/ml/min Q3W)<br>ii) paclitaxel (200 mg/m <sup>2</sup> Q3W)<br>iii) bevacizumab (15 mg/kg Q3W)           | IV            | 2015-2016      | PFS, OS in the wild-type | PFS, OS in ITT, ORR, DOR, safety | 35(8.8) vs 45(11.3)                         | 13 (3.2) vs 21 (5.2)                       | SP142                         |
| KEYNOTE-021, 2016 and 2018 | Phase 2, open-lable, Crossover permitted     | AC<br>i) carboplatin (5mg/ml/min Q3W)<br>ii) pemetrexed (500 mg/m <sup>2</sup> Q3W)                                               | IIIB or IV    | 2014-2016      | ORR                      | PFS, OS, DOR, safety             | 0                                           | 0                                          | 22C3                          |
| KEYNOTE-407, 2018          | Phase 3, double-blind, Crossover permitted   | PC<br>i) carboplatin (6mg/ml/min Q3W)<br>ii) paclitaxel (200mg/m <sup>2</sup> Q3W) or nab-paclitaxel (100mg/m <sup>2</sup> Q1W)   | IV            | 2016-2018      | PFS, OS                  | ORR, DOR, safety                 | NR                                          | NR                                         | 22C3                          |
| IMpower131, 2018           | Phase 3, open-lable, Crossover not permitted | PC<br>i) carboplatin (6mg/ml/min Q3W)<br>ii) nab-paclitaxel (100mg/m <sup>2</sup> Q1W)                                            | IV            | 2015-2017      | PFS, OS                  | ORR, DOR, safety                 | NR                                          | NR                                         | SP142                         |
| CheckMate 227, 2018        | Phase 3, open-lable                          | Non-squamous: pemetrexed+cisplatin or carboplatin Q3W;<br>Squamous: gemcitabine+cisplatin or carboplatin Q3W                      | IV            | 2015-          | PFS, OS                  | ORR, DOR, safety                 | 0                                           | 0                                          | 28-8                          |

<sup>a</sup> Data presented as "IO-chemotherapy group vs chemotherapy group".

Abbreviations: IO, immuno-oncology; NR, not reported; PFS, progression-free survival; OS, overall survival; ORR, objective response rate; DOR, duration of response.

**Supplementary Table 3. Main outcomes of the included trials**

| Source                     | Median Follow-up (months) | PFS (months) <sup>a</sup> | OS (months) <sup>a</sup> | ORR (%) <sup>a</sup> | DOR <sup>a</sup> (months) | Duration <sup>a</sup> of treatment (months) |
|----------------------------|---------------------------|---------------------------|--------------------------|----------------------|---------------------------|---------------------------------------------|
| KEYNOTE-189, 2018          | 10.5                      | 8.8 vs 4.9                | Not Reached vs 11.3      | 48% vs 19%           | 11.2 vs 7.8               | 7.4 vs 5.4 <sup>b</sup>                     |
| IMpower150, 2018           | 20                        | 8.3 vs 6.8                | 19.2 vs. 14.7            | 56% vs 41%           | 11.5 vs 6.0               | 8.2 vs 5.1 <sup>c</sup>                     |
| KEYNOTE-021, 2016 and 2018 | 23.9                      | 24.0 vs 9.3               | Not Reached vs 21.1      | 57% vs 30%           | Not Reached vs 16.2       | 8.0 vs 4.9 <sup>b</sup>                     |
| KEYNOTE-407, 2018          | 7.8                       | 6.4 vs 4.8                | 15.9 vs 11.3             | 58% vs 38%           | 7.7 vs 4.8                | 6.3 vs 4.7 <sup>c</sup>                     |
| IMpower131, 2018           | 17.1                      | 6.3 vs 5.6                | 14.0 vs 13.9             | 49% vs 41%           | 7.2 vs 5.2                | 6.7 vs 2.8 <sup>c</sup>                     |
| CheckMate 227, 2018        | 11.2                      | 5.6 vs 4.7                | NR                       | 37% vs 23%           | 7.2 vs 4.7                | 8.5 cycles <sup>c</sup> vs 4-7 cycles       |

<sup>a</sup> Data presented as "IO-chemotherapy group vs chemotherapy group".

<sup>b</sup> mean duration of treatment

<sup>c</sup> median duration of treatment

Abbreviations: PFS, progression-free survival; OS, overall survival; ORR, objective response rate; DOR, duration of response.

**Supplementary Table 4. Summary of the data status for subgroup-analyses among the included trials**

| Source                     | PD-L1 tumor proportion score |    |     | Histology |    |     | Age |    |     | Sex |    |     | ECOG PS |    |     | Smoking status |    |     | EGFR mutation or ALK translocation |    |     | IO Drug |    |     |
|----------------------------|------------------------------|----|-----|-----------|----|-----|-----|----|-----|-----|----|-----|---------|----|-----|----------------|----|-----|------------------------------------|----|-----|---------|----|-----|
|                            | PFS                          | OS | ORR | PFS       | OS | ORR | PFS | OS | ORR | PFS | OS | ORR | PFS     | OS | ORR | PFS            | OS | ORR | PFS                                | OS | ORR | PFS     | OS | ORR |
| KEYNOTE-189, 2018          | Y                            | Y  | Y   | Y         | Y  | Y   | Y   | Y  | N   | Y   | Y  | N   | Y       | Y  | N   | Y              | Y  | N   | Y                                  | Y  | N   | Y       | Y  | Y   |
| IMpower150, 2018           | Y                            | Y  | Y   | Y         | Y  | Y   | Y   | N  | N   | Y   | N  | N   | Y       | N  | N   | Y              | N  | N   | Y                                  | Y  | N   | Y       | Y  | Y   |
| KEYNOTE-021, 2016 and 2018 | N                            | N  | Y   | Y         | Y  | Y   | N   | N  | N   | N   | N  | N   | N       | N  | N   | N              | N  | N   | Y                                  | Y  | N   | Y       | Y  | Y   |
| KEYNOTE-407, 2018          | Y                            | Y  | N   | Y         | Y  | Y   | N   | Y  | N   | N   | Y  | N   | N       | Y  | N   | N              | N  | N   | Y                                  | Y  | N   | Y       | Y  | Y   |
| IMpower131, 2018           | Y                            | Y  | Y   | Y         | Y  | Y   | Y   | N  | N   | Y   | N  | N   | Y       | N  | N   | Y              | N  | N   | Y                                  | Y  | N   | Y       | Y  | Y   |
| CheckMate 227, 2018        | Y                            | N  | Y   | Y         | N  | N   | Y   | N  | N   | Y   | N  | N   | Y       | N  | N   | N              | N  | N   | Y                                  | N  | N   | Y       | N  | Y   |
| Trials Enrolled (n)        | 5                            | 4  | 5   | 6         | 5  | 5   | 4   | 2  | 0   | 4   | 2  | 0   | 4       | 2  | 0   | 3              | 1  | 0   | 6                                  | 5  | 0   | 6       | 5  | 6   |

Abbreviations: Y, data available; N, data not available; PFS, progression-free survival; OS, overall survival; ORR, objective response rate; ECOG PS, ECOG performance-status score; IO, immuno-oncology.

**Supplementary Table 5. Summary of sensitivity analyses results using both fixed-effects and random-effects models.**

| Outcome | Subgroup             | No. of Studies | HR/RR | LL   | UL   | Effect Size Z | P-value | Heterogeneity P-value | $I^2$ |
|---------|----------------------|----------------|-------|------|------|---------------|---------|-----------------------|-------|
| PFS     | Fixed-Effects Model  | 6              | 0.62  | 0.57 | 0.67 | 11.06         | <0.001  | 0.123                 | 42.3% |
|         | Random-Effects Model | 6              | 0.62  | 0.55 | 0.69 | 8.12          | <0.001  | 0.123                 | 42.3% |
| OS      | Fixed-Effects Model  | 5              | 0.72  | 0.65 | 0.81 | 5.78          | <0.001  | <0.001                | 77.3% |
|         | Random-Effects Model | 5              | 0.68  | 0.53 | 0.87 | 3.04          | 0.002   | <0.001                | 77.3% |
| ORR     | Random-Effects Model | 6              | 1.48  | 1.36 | 1.62 | 9.19          | <0.001  | <0.001                | 77.6% |
|         | Fixed-Effects Model  | 6              | 1.56  | 1.29 | 1.89 | 4.52          | <0.001  | <0.001                | 77.6% |

PFS, progression-free survival; OS, overall survival; ORR, objective response rate; HR, hazard ratio; RR, relative risk; LL, lower limit; UL, upper limit

**Supplementary Table 6. Summary of sensitivity analyses after removing studies that were only available from conference presentation.**

| Outcome | Subgroup             | No. of Studies | HR/RR | LL   | UL   | Effect Size Z | P-value | Heterogeneity P-value | I <sup>2</sup> |
|---------|----------------------|----------------|-------|------|------|---------------|---------|-----------------------|----------------|
| PFS     | Fixed-Effects Model  | 3              | 0.57  | 0.50 | 0.64 | 9.07          | <0.001  | 0.455                 | 0.0%           |
|         | Random-Effects Model | 3              | 0.57  | 0.50 | 0.64 | 9.07          | <0.001  | 0.123                 | 0.0%           |
| OS      | Fixed-Effects Model  | 3              | 0.64  | 0.55 | 0.75 | 5.79          | <0.001  | 0.027                 | 72.4%          |
|         | Random-Effects Model | 3              | 0.61  | 0.44 | 0.84 | 2.99          | 0.003   | 0.027                 | 72.4%          |
| ORR     | Random-Effects Model | 3              | 1.63  | 1.44 | 1.84 | 7.65          | <0.001  | <0.001                | 88.5%          |
|         | Fixed-Effects Model  | 3              | 1.82  | 1.13 | 2.91 | 2.47          | 0.013   | <0.001                | 88.5%          |

PFS, progression-free survival; OS, overall survival; ORR, objective response rate; HR, hazard ratio; RR, relative risk; LL, lower limit; UL, upper limit
